# Supplementary material
Source: publisher figshare collection journal article supplement (https://acs.figshare.com/ndownloader/files/9161530)
Supplement: Supplementary file 1 [file 9161530]

# Supporting Information for

## Scandium and Yttrium Environments in Aluminosilicate Glasses Unveiled by $^{45}\text{Sc}/^{89}\text{Y}$ NMR Spectroscopy and DFT Calculations: What Structural Factors Dictate the Chemical Shifts?

Aleksander Jaworski<sup>a</sup>, Thibault Charpentier<sup>b</sup>, Baltzar Stevansson<sup>a</sup>, and Mattias Edén<sup>a,\*</sup>

<sup>a</sup>Physical Chemistry Division, Department of Materials and Environmental Chemistry,  
Stockholm University, SE-106 91 Stockholm, Sweden

<sup>b</sup>NIMBE, CEA, CNRS, Université Paris-Saclay, CEA Saclay, 91191 Gif-sur-Yvette cedex, France

\*Corresponding author. E-mail address: *mattias.eden@mmk.su.se*

### Contents

1. **Section S1.** Implementation of the DFT+ $U$  Procedure.
2. **Figure S1.**  $^{17}\text{O}$  NMR References.
3. **Figure S2.**  $^{17}\text{O}$  NMR Shifts for  $\text{Sc}_2\text{O}_3$  and  $\text{YAlO}_3$ .
4. **Figure S3.**  $^{45}\text{Sc}$  NMR Shifts for  $\text{Sc}_2\text{O}_3$  from “Direct” and  $U$ -Corrected Calculations.
5. **References**

## S1. Implementation of the DFT+ $U$ Procedure

For several elements, such as Ca, Sc, and La, electronic structure calculations at the PBE-DFT level of theory are prone to overestimating the hybridization between the  $2p$  O orbital and the unoccupied  $3d^0$  and  $4f^0$  cation-localized orbitals. This results in an emphasized covalent bonding character, thereby deteriorating the accuracy of the NMR parameter predictions.<sup>S1-S4</sup> To remedy this problem, here we employ the “DFT+ $U$ ” approach,<sup>S1,S2</sup> which involves an artificial shift ( $U$ ) of the  $3d^0$  (Sc) and  $4f^0$  (Y) states towards higher energy to reduce the bond covalency and better reproduce the experimentally determined NMR chemical shifts.

To locate suitable values of  $U$  for  $^{45}\text{Sc}$  and  $^{89}\text{Y}$ ,  $^{17}\text{O}$  isotropic chemicals shifts of some reference structures were exploited, whose experimental values are available and for which the PBE-DFT/GIPAW framework provides accurate predictions:  $\text{Na}_2\text{MoO}_4$ ,  $\text{SiO}_2$  (quartz),  $\alpha\text{-Al}_2\text{O}_3$  and  $\text{NaAlO}_2$  (see **Figure S1**). Linear regression of the data using the equation

$$\delta_{\text{iso}}^j = -\alpha(\sigma_{\text{iso}}^{\text{S},j} - \sigma_{\text{iso}}^{\text{S},\text{ref}}) \quad (\text{S1})$$

provided a slope very close to unity ( $\alpha = 0.99$ ), and  $\sigma_{\text{iso}}^{\text{S},\text{ref}} = 256.4$  ppm. However, the  $^{17}\text{O}$  chemical shifts of  $\text{Sc}_2\text{O}_3$  and  $\text{YAlO}_3$  deviate significantly to the regression results. Following the procedures discussed in refs. S1 and S2, the value of  $U$  was determined such that the predicted  $\sigma_{\text{iso}}^{\text{S},j}$  result matches the regression, yielding the optimal  $U$  energy shifts of 5.0 eV ( $3d^0$ ) and 2.8 eV ( $4f^0$ ) for Sc and Y, respectively, as illustrated in **Figure S2**. The results of **Figure S3** reveal significantly improved  $^{45}\text{Sc}$  chemical shift predictions when the DFT+ $U$  approach was applied to  $\text{Sc}_2\text{O}_3$  [eq S1].

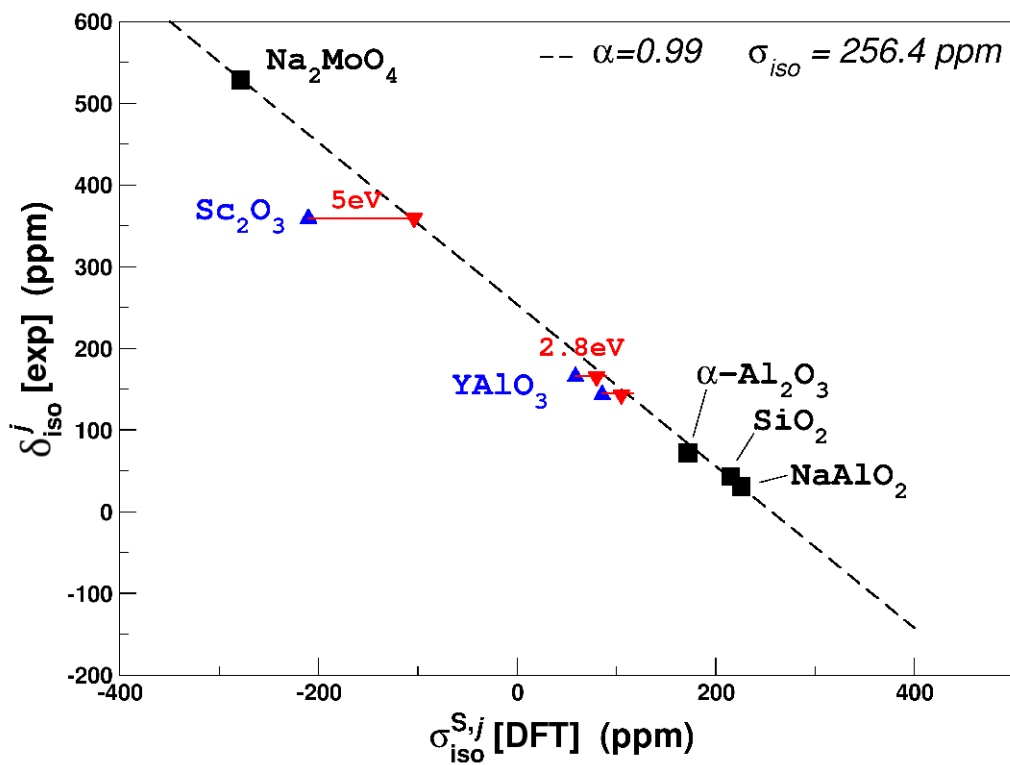

**Figure S1.** Experimental  $^{17}\text{O}$  NMR isotropic chemical shifts plotted against their corresponding PBE-DFT/GIPAW calculated  $\sigma_{\text{iso}}^{S,j}$ -values (black squares) for the as-indicated reference structures, and the resulting regression line. Results for  $^{17}\text{O}$  sites of  $\text{Sc}_2\text{O}_3$  and  $\text{YAlO}_3$  from the uncorrected PBE-DFT/GIPAW calculations are provided as blue triangles, whereas red triangles show the results from employing  $U$ -corrections of 5.0 eV ( $3d^0$ ) and 2.8 eV ( $4f^0$ ) for Sc and Y, respectively.

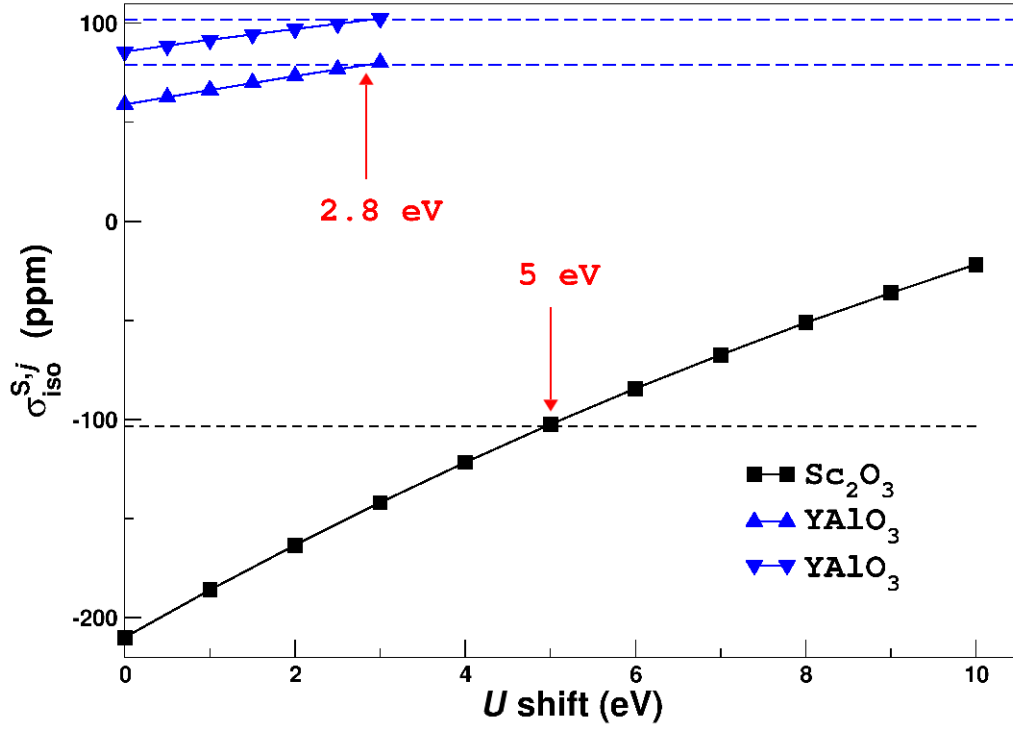

**Figure S2.** Dependence of the calculated  $^{17}\text{O}$   $\sigma_{\text{iso}}^{S,j}$ -values on the  $U$  energy shift of  $3d^0$  and  $4f^0$  states for Sc and Y, respectively, as presented for  $\text{Sc}_2\text{O}_3$  (black squares) and  $\text{YAlO}_3$  (blue triangles). Each point represents the result of an individual DFT+ $U$  calculation upon a stepwise  $U$ -value adjustment. Dashed lines correspond to the case of coinciding experimental and DFT+ $U$ /GIPAW-derived  $^{17}\text{O}$   $\sigma_{\text{iso}}^{S,j}$ -values, establishing our computational setup for evaluation of the  $^{45}\text{Sc}$  and  $^{89}\text{Y}$  chemical shifts in the glass models.

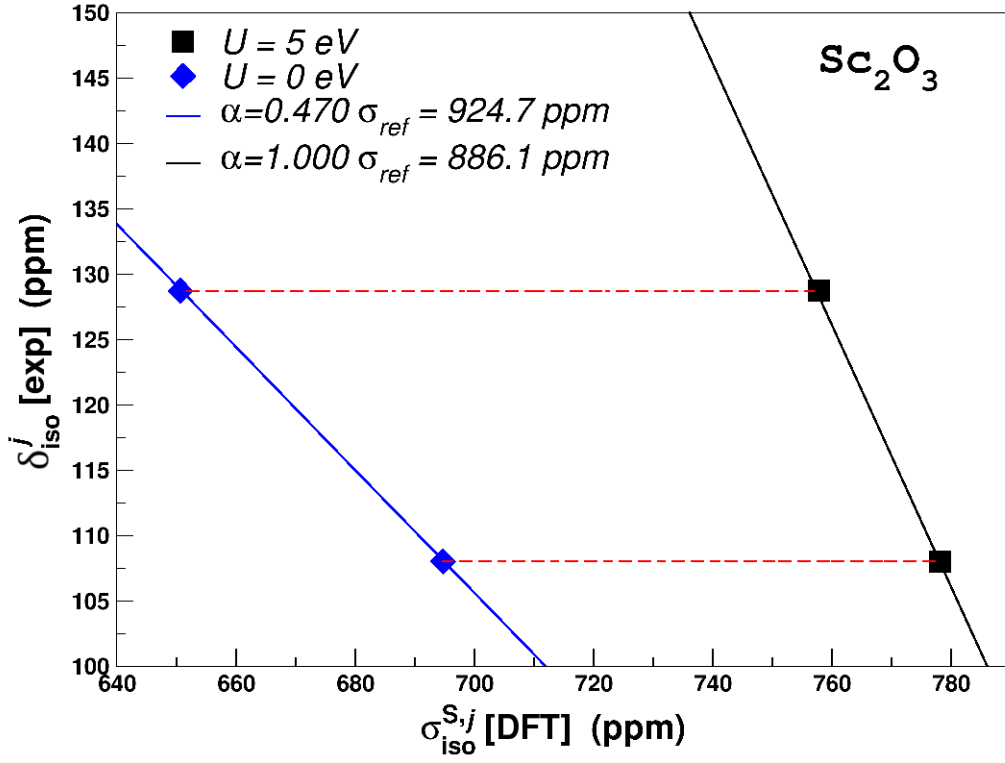

**Figure S3.** Experimental NMR-derived  $^{45}\text{Sc}$  isotropic chemical shifts and the corresponding  $\sigma_{\text{iso}}^{S,j}$ -values calculated at the PBE-DFT/GIPAW level of theory for the two inequivalent  $^{45}\text{Sc}$  sites of  $\text{Sc}_2\text{O}_3$ . Blue and black squares represent the uncorrected and  $U$ -corrected results, respectively. The unity slope associated with the experimental NMR ( $\delta_{\text{iso}}^j$ ) and GIPAW-derived  $U$ -corrected ( $\sigma_{\text{iso}}^{S,j}$ )  $^{45}\text{Sc}$  results validates our employed  $3d^0$  energy-shift value of 5.0 eV for Sc.

## References

- (S1) Profeta, M.; Benoit, M.; Mauri, F.; Pickard, C. First-Principles Calculation of the  $^{17}\text{O}$  NMR Parameters in Ca Oxide and Ca Aluminosilicates: The Partially Covalent Nature of the Ca–O Bond, a Challenge for Density Functional Theory. *J. Am. Chem. Soc.* **2004**, *126*, 12628–12635.
- (S2) Sadoc, A.; Body, M.; Legein, C.; Biswal, M.; Fayon, F.; Rocquefelte, X.; Boucher, F. NMR Parameters in Alkali, Alkaline Earth and Rare Earth Fluorides from First Principle Calculations. *Phys. Chem. Chem. Phys.* **2011**, *13*, 18539–18550.
- (S3) Gervais, C.; Laurencin, D.; Wong, A.; Pourpoint, F.; Labram, J.; Woodward, B.; Howes, A.; Pike, K. J.; Dupree, R.; Mauri, F.; Bonhomme, C.; Smith, M. E. New Perspectives on Calcium Environments in Inorganic Materials Containing Calcium-Oxygen Bonds: A Combined Computational-Experimental  $^{43}\text{Ca}$  NMR Approach. *Chem. Phys. Lett.* **2008**, *464*, 42–48.
- (S4) Benoit, M.; Profeta, M.; Mauri, F.; Pickard, C.; Tuckerman, M. First-Principles Calculation of the  $^{17}\text{O}$  NMR Parameters of a Calcium Aluminosilicate Glass. *J. Phys. Chem. B* **2005**, *109*, 6052–6060.
